# Supplementary material
Source: PubMed Central journal article supplement (PMC2570991)
Supplement: 0806526105_0806526105SI.pdf [file 0806526105_0806526105SI.pdf]

# Supporting Information

Shuda *et al.* 10.1073/pnas.0806526105

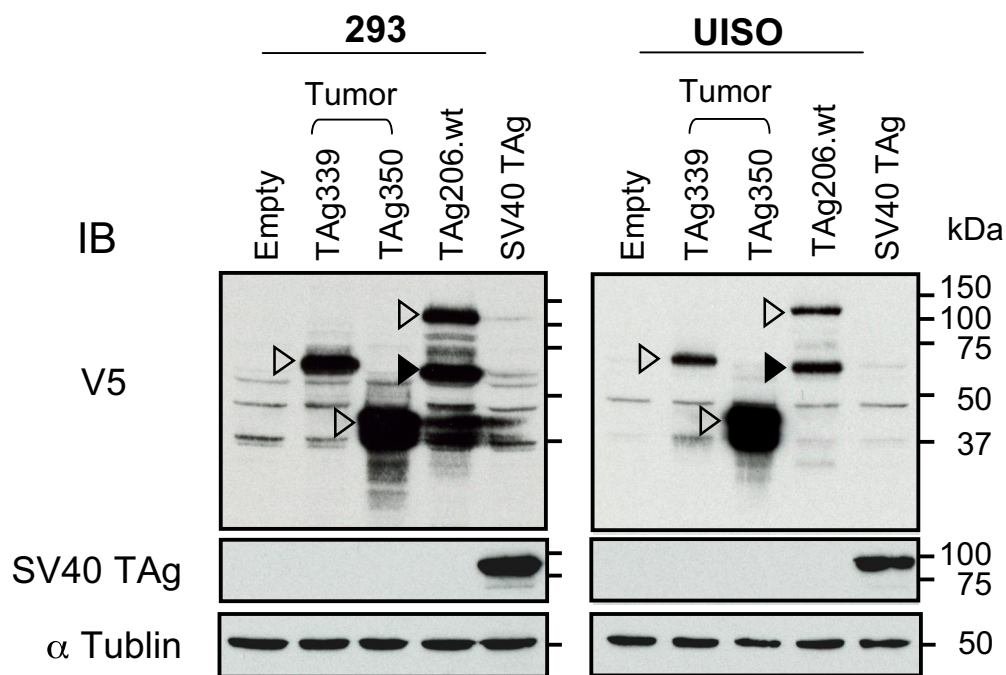

**Fig. S1.** Expression of T Ag proteins in 293 and UIISO cell lines. Ten percent of cell lysate used for origin replication assay was subjected to immunoblot analysis to confirm T Ag protein expression. Open arrows indicate truncated tumor-derived LT or WT LT proteins. Closed arrows indicate T antigen protein isoforms.

**Table S1. MCV PCR detection in various cell lines**

| Name   | Origin                                       | LT1 | LT3 | VP1 | Summary |
|--------|----------------------------------------------|-----|-----|-----|---------|
| 293    | Human embryonic kidney                       | –   | –   | –   | –       |
| COS7   | SV40-transfected African green monkey kidney | –   | –   | –   | –       |
| HT1080 | Human fibrosarcoma                           | –   | –   | –   | –       |
| MCF7   | Human breast cancer                          | –   | –   | –   | –       |
| UISO   | MCC                                          | –   | –   | –   | –       |
| MCC13  | MCC                                          | –   | –   | –   | –       |
| MCC26  | MCC                                          | –   | –   | –   | –       |
| MKL-1  | MCC                                          | +   | +   | +   | +       |

One hundred nanograms of genomic DNA was amplified by using Taq DNA polymerase (Invitrogen) in a final volume of 50  $\mu$ l. The cycling condition was 3 min at 94°C, followed by 31 cycles each of 94°C for 45 s, 58°C for 30 s, and 72°C for 45 s, and final elongation of 15 min at 72°C. Three different primer sets for the T antigen locus (LT1 and LT3) and VP1 gene (VP1) were used to detect MCV (1).

1. Feng H, Shuda M, Chang Y, Moore PS (2008) Clonal integration of a polyomavirus in human Merkel cell carcinoma. *Science* 319:1096–1100.

Table S2. Primer sequences

| Primer                            | Sequence                              |
|-----------------------------------|---------------------------------------|
| DNA sequencing of control tissues |                                       |
| MCV.LT.P1.F1                      | AGTCATTGCTCCTCTGCT                    |
| MCV.LT.P1.R1                      | ATTGGGTGTGCTGGATTCTC                  |
| MCV.LT.P1.F2.HindIII              | CCAAGCTTTTCTCCTCTGCTSTTTCTG           |
| MCV.LT.P1.R2                      | TTGGTGGTCTCCTCTCTGCT                  |
| MCV.LT.P2.F1                      | TGGGTATGGGTCTTCTCAG                   |
| MCV.LT.P2.R1                      | GCTTGTTGGCAAATGGTTTT                  |
| MCV.LT.P2.F2                      | GCTTCAGACTCCAGTCCAG                   |
| MCV.LT.P2.R2                      | TGGCAAATGGTTTTCTGAGAT                 |
| MCV.LT.P3.F1                      | CCATTTCTTGCCAAAAGTG                   |
| MCV.LT.P3.R1                      | GCCCCAGAAAAACAAACACA                  |
| MCV.LT.P3.F2                      | CAGATCTCGCCTCAAACCTC                  |
| MCV.LT.P3.R2.XhoI                 | CCGCTCGAGTGAAGCAGATGCCTTTATTGA        |
| DNA replication assay             |                                       |
| Ori.5074.Xho(S)                   | CTCGAGAGCAATTTACCAATATTGGCC           |
| Ori.270.EcoV(AS)                  | GATATCGCCATAACAATTAGGAGCAATCT         |
| RACE analysis of T antigen*       |                                       |
| GeneRacer 5' primer               | CGACTGGAGCACGAGGACACTGA               |
| GeneRacer 5' nested primer        | GGACACTGACATGGACTGAAGGAGTA            |
| GeneRacer 3' primer               | GCTGTCAACGATACGCTACGTAACG             |
| GeneRacer 3' nested primer        | CGCTACGTAACGGCATGACAGTG               |
| M1L                               | TTCTCTTGCAATTTTGAAGGGGACTTAC          |
| M3                                | TTTCAGGCATCTTATCACTCC                 |
| M2L                               | AGCAGGCATGCCTGTGAATTAGGATGTA          |
| M4                                | TTTTTGCTTACCTTCTGCACT                 |
| 350.RACE.F                        | TTTCCTTGGGAAGAATATGGAACCTTAAAGGA      |
| 350.RACE.R                        | TAATACAAGCGCACTTAGAATCTCTAAGTTGCT     |
| 350.t.nested.F                    | GCTAGATTTTGCAAGGCTCTG                 |
| 350.contig.1R                     | CCAGGACCTCTGCAAAATCT                  |
| 350.contig.2R                     | ATATAGGGGCTCGTCAACC                   |
| 350.contig.3R                     | GGGAGGAAAGTGATTCACTG                  |
| 350.contig.4R                     | AAATGGCAAACAACCTACTGTT                |
| 350.contig.5R                     | GAGCCTTGTGAGGTTTGAAG                  |
| 350.contig.6R                     | GCAGCAAAGCTTGTTTTTCC                  |
| 350.contig.7R                     | TGTATCAGGCAAGCACAAA                   |
| 350.contig.8R                     | TTACCCAAAGCCTCTGTGG                   |
| 350.contig.9R                     | TCAGACAGGCTCTCAGACTCC                 |
| 350.FLT.XhoI.R                    | CCGCTCGAGCGTGGGCTATTAGACAGGCTCT       |
| 350.FLT.KpnI.F1                   | GGGGTACCCAGCTCATTTGCTCTCTGCT          |
| 350.FLT.KpnI.F2                   | GGGGTACCCAGCTCATTTGCTCTCTGCTGTTTCT    |
| Cloning of MCV T antigen          |                                       |
| MCV.EcoRV(S)                      | CCGATATCATGGATTTAGTCTCTAAATAGG        |
| MCV.XhoI(AS)                      | GGGCTCGAGTATTGAGAAAAAGTACCAGAATCTTGGG |
| MCV.350.XhoI(S)                   | GGGCTCGAGTAATCTGAAAAGTACCAGAATCTTGGG  |
| MCV.339.EcoRV(AS)                 | CCGATATCATGGATTTAGTCTCTAAACAGG        |
| MCV.339.XhoI(AS)                  | GGGCTCGAGTACATAGCATTCTGTCTCTGGTCAT    |
| Probes in Northern blotting       |                                       |
| MCV350(196–429).S                 | ATGGATTTAGTCTCTAAATAGGAAAG            |
| MCV350(196–429).AS                | CTCATCAAACATAGAGAAGTACC               |
| MCV350(430–756).S                 | GTTAGTACAAAATTTCTTGGGAAG              |
| MCV350(430–756).AS                | CTAGAAAAGGTGCAGATGCAGTAAGC            |
| MCV350(861–1622).S                | CACAGCCAGAGCTCTCTCTGGG                |
| MCV350(861–1622).AS               | GGTGAAGGAGGAGGATATGTATTCC             |
| MCV350(1623–2777).S               | GGAGTGAATAAGATGCCTGAAATG              |
| MCV350(1623–2777).AS              | GCATTTCTGTCTGGTCAATTTCCAGC            |
| MCV350(2778–3080).S               | GCAAATCTAAGAGATTCCCTGGATC             |
| MCV350(2778–3080).AS              | TTATTGAGAAAAAGTACCAGAATCTTGGG         |
| LXCXE mutagenesis                 |                                       |
| MCV.T.E216K(S)                    | GGATCTCTTCTGCGATAAATCACTTCTCTCC       |
| MCV.T.E216K(AS)                   | GGAGGAAAGTATTTATCGCAGAAGAGATCC        |

\*RACE results identify the following splicing sites (Fig. 1) according to the MCV prototype (EU375803): T1 exon 1 (196–429), exon 2 (861–3080); T2 exon 1 (196–777), exon 2 (861–3080); T3 exon 1 (196–777), exon 2 (861–1622), exon 3 (2778–3080); T4 exon 1 (196–429), exon 2 (861–1622), exon 3 (2778–3080).
